# Supplementary material for: Development and validation of a quality of life and treatment satisfaction measure in canine osteoarthritis
Source: Frontiers journal article supplement (doi:10.3389/fvets.2024.1377019), 2024-05-03
Supplement: Image_3.pdf [file Image_3.pdf]

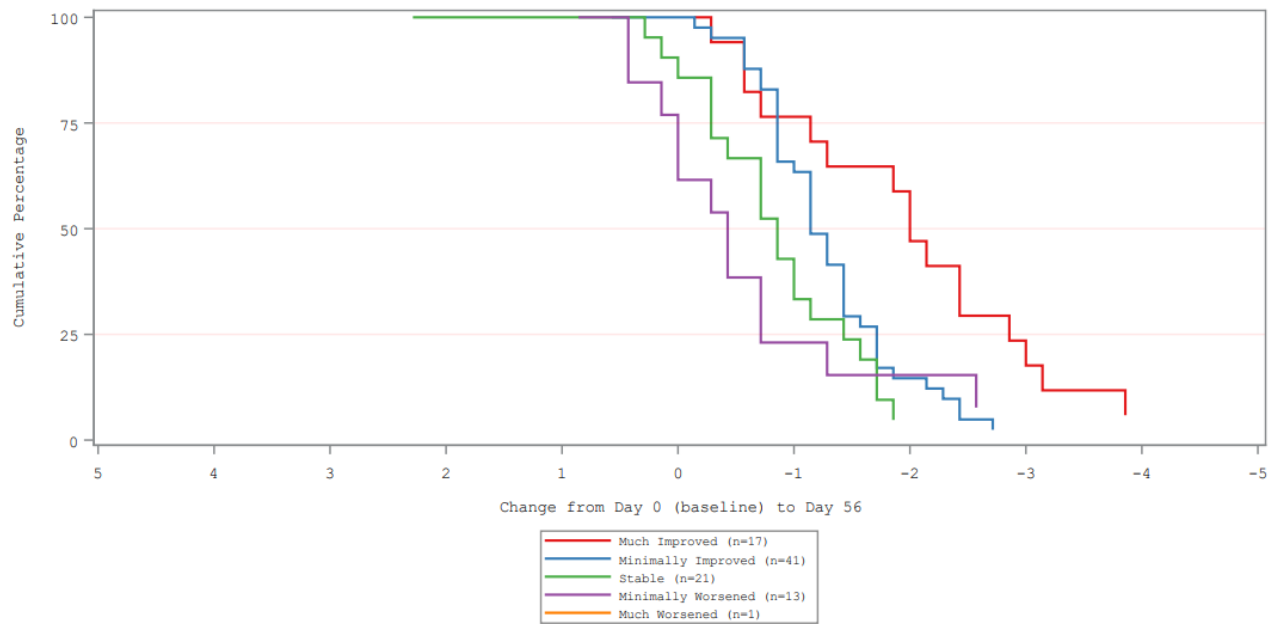

Supplementary Figure 3. Cumulative distribution function of Owner QoL domain score change by OGIO-QoL anchor group
